# Supplementary material for: Autologous Doping with Cryopreserved Red Blood Cells – Effects on Physical Performance and Detection by Multivariate Statistics
Source: PLoS One. 2016 Jun 10;11(6):e0156157. doi: 10.1371/journal.pone.0156157 (PMC4902314; doi:10.1371/journal.pone.0156157)
Supplement: S2 File — (XLSX) [file pone.0156157.s002.xlsx]

## Sheet: Dataset - BTM_Sunderby_20160304
Code	Group	Time Point	Timeline (week)	Test	Height (cm)	Weight 1 (kg)	S-Transferrin	B-Hb	B-EPK	B-EVF	B-MCV	B-MCHC	B-retikolucyter	Epo	Ret % of RBC	B-retikulocyter/RBC
J	Control	1	0	Before VO2max1			2.34	147	4.9	0.43	88	340	39	3.6	0.795918	7.96
K	Control	1	0	Before VO2max1	178,6	78,7	2.14	147	4.9	0.43	88	343	60	7.8	1.22449	12.24
L	Control	1	0	Before VO2max1	190,5	103,4	2.55	144	4.8	0.43	91	332	37	20	0.770833	7.71
M	Control	1	0	Before VO2max1	182,6	80,1	1.82	130	4.7	0.38	79	346	44	11	0.93617	9.36
O	Control	1	0	Before VO2max1	191,4	88,6	2.54	141	4.9	0.41	85	341	54	11	1.10204	11.02
S	Control	1	0	Before VO2max1	181,6	97,7	2.86	131	4.8	0.4	82	331	38	11	0.791667	7.92
U	Control	1	0	Before VO2max1	177,6	73	1.9	129	4.4	0.38	85	341	41	10	0.931818	9.32
W	Control	1	0	Before VO2max1	176,5	73,5	2.1	141	4.7	0.41	88	343	29	9.7	0.617021	6.17
A	Transfusion	1	0	Before VO2max1	178,9	78,3	2.37	138	4.8	0.42	87	332	50	13	1.04167	10.42
B	Transfusion	1	0	Before VO2max1	195,3	94,8	2.13	141	5	0.42	84	338	38	81	0.76	7.6
C	Transfusion	1	0	Before VO2max1	178,7	93,2	2.1	142	4.8	0.42	87	341	52	7.7	1.08333	10.83
D	Transfusion	1	0	Before VO2max1	174	71,7	1.9	146	5	0.44	87	336	50	13	1	10
F	Transfusion	1	0	Before VO2max1	175,9	71,8	2.14	128	4.1	0.38	93	336	35	12	0.853659	8.54
G	Transfusion	1	0	Before VO2max1	180,5	97,7	2.23	139	4.5	0.41	92	337	64	23	1.42222	14.22
H	Transfusion	1	0	Before VO2max1	189	81,7	2.19	147	5	0.43	85	342	36	7.5	0.72	7.2
N	Transfusion	1	0	Before VO2max1	182,7	92,9	2.96	132	4.6	0.39	85	338	21	12	0.456522	4.57
Q	Transfusion	1	0	Before VO2max1	172,7	72,9	2.42	136	4.4	0.4	90	342	36	16	0.818182	8.18
R	Transfusion	1	0	Before VO2max1	186,6	68,3	2.13	140	4.7	0.41	87	344	31	7.4	0.659574	6.6
T	Transfusion	1	0	Before VO2max1	174,2	87,6	2.11	136	4.5	0.4	87	343	36	12	0.8	8
J	Control	2	2	48h Post Donation Before VO2max2			2.49	144	5	0.44	89	327	42	6.8	0.84	8.4
K	Control	2	2	48h Post Donation Before VO2max2	178,6	78,7	1.99	142	4.8	0.42	89	336	47	6.4	0.979167	9.79
L	Control	2	2	48h Post Donation Before VO2max2	190,5	103,4	2.63	137	4.7	0.42	90	325	42	18	0.893617	8.94
M	Control	2	2	48h Post Donation Before VO2max2	182,6	80,1	1.97	124	4.6	0.37	80	336	44		0.956522	9.57
O	Control	2	2	48h Post Donation Before VO2max2	191,4	88,6	2.28	128	4.5	0.39	87	329	38	12	0.844444	8.44
S	Control	2	2	48h Post Donation Before VO2max2	181,6	97,7	2.57	129	4.8	0.39	81	332	44	13	0.916667	9.17
U	Control	2	2	48h Post Donation Before VO2max2	177,6	73	1.78	126	4.4	0.38	87	332	59	14	1.34091	13.41
W	Control	2	2	48h Post Donation Before VO2max2	176,5	73,5	2.11	141	4.8	0.42	88	334	31	11	0.645833	6.46
A	Transfusion	2	2	48h Post Donation Before VO2max2	178,9	78,3	2.32	112	4	0.35	88	317	79	24	1.975	19.75
B	Transfusion	2	2	48h Post Donation Before VO2max2	195,3	94,8	2.3	125	4.4	0.38	85	332	56	97	1.27273	12.73
C	Transfusion	2	2	48h Post Donation Before VO2max2	178,7	93,2	2.08	123	4.3	0.37	87	332	72	15	1.67442	16.74
D	Transfusion	2	2	48h Post Donation Before VO2max2	174	71,7	2.08	122	4.3	0.38	87	325	64	25	1.48837	14.88
F	Transfusion	2	2	48h Post Donation Before VO2max2	175,9	71,8	2.58	119	3.8	0.37	95	326	51	15	1.34211	13.42
G	Transfusion	2	2	48h Post Donation Before VO2max2	180,5	97,7	2.29	126	4.1	0.39	94	326	102	32	2.4878	24.88
H	Transfusion	2	2	48h Post Donation Before VO2max2	189	81,7	2.35	125	4.4	0.38	85	333	49	9.3	1.11364	11.14
N	Transfusion	2	2	48h Post Donation Before VO2max2	182,7	92,9	2.76	117	4.1	0.35	85	335	51	16	1.2439	12.44
Q	Transfusion	2	2	48h Post Donation Before VO2max2	172,7	72,9	2.28	121	4	0.36	91	335	60	32	1.5	15
R	Transfusion	2	2	48h Post Donation Before VO2max2	186,6	68,3	2.04	122	4.1	0.36	87	344	40	14	0.97561	9.76
T	Transfusion	2	2	48h Post Donation Before VO2max2	174,2	87,6	2.08	123	4.1	0.36	87	341	60	20	1.46341	14.63
J	Control	3	7	5 w Post Donation Before VO2max3			2.38	148	5.1	0.46	91	322	38	7.5	0.745098	7.45
K	Control	3	7	5 w Post Donation Before VO2max3	178,6	78,7	2.02	135	4.6	0.4	88	334	55	6.3	1.19565	11.96
L	Control	3	7	5 w Post Donation Before VO2max3	190,5	103,4	2.75	144	4.8	0.43	90	333	37	14	0.770833	7.71
M	Control	3	7	5 w Post Donation Before VO2max3	182,6	80,1		134	4.9	0.4	82	336	45	8.6	0.918367	9.18
O	Control	3	7	5 w Post Donation Before VO2max3	191,4	88,6	2.38	135	4.6	0.41	88	333	48	14	1.04348	10.43
S	Control	3	7	5 w Post Donation Before VO2max3	181,6	97,7	2.73	133	4.9	0.4	82	333	39	11	0.795918	7.96
U	Control	3	7	5 w Post Donation Before VO2max3	177,6	73	2.14	135	4.5	0.4	89	334	50	8	1.11111	11.11
W	Control	3	7	5 w Post Donation Before VO2max3	176,5	73,5	1.95	136	4.6	0.4	87	337	31	10	0.673913	6.74
A	Transfusion	3	7	5 w Post Donation Before VO2max3	178,9	78,3	2.56	129	4.6	0.41	89	316	46	13	1	10
B	Transfusion	3	7	5 w Post Donation Before VO2max3	195,3	94,8	2.4	134	4.8	0.41	86	325	43	73	0.895833	8.96
C	Transfusion	3	7	5 w Post Donation Before VO2max3	178,7	93,2	2.39	137	4.7	0.42	88	330	47	7.7	1	10
D	Transfusion	3	7	5 w Post Donation Before VO2max3	174	71,7	2.16	139	4.8	0.43	89	324	45	14	0.9375	9.38
F	Transfusion	3	7	5 w Post Donation Before VO2max3	175,9	71,8	2.68	126	4.1	0.39	95	323	29	13	0.707317	7.07
G	Transfusion	3	7	5 w Post Donation Before VO2max3	180,5	97,7	2.53	151	4.8	0.46	94	330	106	10	2.20833	22.08
H	Transfusion	3	7	5 w Post Donation Before VO2max3	189	81,7	2.27	126	4.4	0.38	87	332	41	9.9	0.931818	9.32
N	Transfusion	3	7	5 w Post Donation Before VO2max3	182,7	92,9	3.35	135	4.6	0.4	87	335	31	9.7	0.673913	6.74
Q	Transfusion	3	7	5 w Post Donation Before VO2max3	172,7	72,9	2.78	141	4.5	0.42	92	337	42	18	0.933333	9.33
R	Transfusion	3	7	5 w Post Donation Before VO2max3	186,6	68,3	2.2	140	4.6	0.41	90	342	29	8	0.630435	6.3
T	Transfusion	3	7	5 w Post Donation Before VO2max3	174,2	87,6	2.38	140	4.7	0.42	89	337	43	16	0.914894	9.15
J	Control	4	16	15w Post Donation Before VO2max4
K	Control	4	16	15w Post Donation Before VO2max4	178,6	78,7	2.19	143	4.9	0.42	86	340	57	8.3	1.16327	11.63
L	Control	4	16	15w Post Donation Before VO2max4	190,5	103,4	2.51	154	5.2	0.45	86	345	58	23	1.11538	11.15
M	Control	4	16	15w Post Donation Before VO2max4	182,6	80,1	1.83	131	4.8	0.39	82	335	28	7.6	0.583333	5.83
O	Control	4	16	15w Post Donation Before VO2max4	191,4	88,6		127	4.4	0.39	90	323	38	14	0.863636	8.64
S	Control	4	16	15w Post Donation Before VO2max4	181,6	97,7	2.39	136	4.9	0.41	84	330	54	9.8	1.10204	11.02
U	Control	4	16	15w Post Donation Before VO2max4	177,6	73	1.93	136	4.6	0.4	86	340	50	10	1.08696	10.87
W	Control	4	16	15w Post Donation Before VO2max4	176,5	73,5	2.05	138	4.7	0.42	89	329	37	12	0.787234	7.87
A	Transfusion	4	16	15w Post Donation Before VO2max4	178,9	78,3	2.32	136	5	0.43	85	320	47	16	0.94	9.4
B	Transfusion	4	16	15w Post Donation Before VO2max4	195,3	94,8	2.38	139	5	0.43	84	327	39	102	0.78	7.8
C	Transfusion	4	16	15w Post Donation Before VO2max4	178,7	93,2	2.08	136	4.8	0.41	85	335	53	7.5	1.10417	11.04
D	Transfusion	4	16	15w Post Donation Before VO2max4	174	71,7	2.15	149	5.3	0.44	83	340	45	19	0.849057	8.49
F	Transfusion	4	16	15w Post Donation Before VO2max4	175,9	71,8	2.39	129	4.4	0.39	90	328	26	11	0.590909	5.91
G	Transfusion	4	16	15w Post Donation Before VO2max4	180,5	97,7	2.18	143	4.8	0.42	88	343	70	19	1.45833	14.58
H	Transfusion	4	16	15w Post Donation Before VO2max4	189	81,7	2.77	154	5.4	0.45	83	341	36	5.6	0.666667	6.67
N	Transfusion	4	16	15w Post Donation Before VO2max4	182,7	92,9								8.8
Q	Transfusion	4	16	15w Post Donation Before VO2max4	172,7	72,9	2.37	134	4.5	0.4	89	338	34	19	0.755556	7.56
R	Transfusion	4	16	15w Post Donation Before VO2max4	186,6	68,3	1.95	133	4.5	0.39	88	338	38	12	0.844444	8.44
T	Transfusion	4	16	15w Post Donation Before VO2max4	174,2	87,6	2.04	132	4.4	0.39	89	337	35	15	0.795455	7.95
J	Control	5	16	15w Post Donation After VO2max4
K	Control	5	16	15w Post Donation After VO2max4	178,6	78,7	2.21	151	5.1	0.44	86	347	62	8.1	1.21569	12.16
L	Control	5	16	15w Post Donation After VO2max4	190,5	103,4	2.7	158	5.3	0.46	86	344	62	22	1.16981	11.7
M	Control	5	16	15w Post Donation After VO2max4	182,6	80,1	1.9	133	5	0.41	81	328	31	8.3	0.62	6.2
O	Control	5	16	15w Post Donation After VO2max4	191,4	88,6	2.32	125	4.3	0.39	89	324	35	17	0.813953	8.14
S	Control	5	16	15w Post Donation After VO2max4	181,6	97,7	2.67	140	5.1	0.42	83	330	49	7.2	0.960784	9.61
U	Control	5	16	15w Post Donation After VO2max4	177,6	73	2.07	143	4.8	0.41	86	350	59	11	1.22917	12.29
W	Control	5	16	15w Post Donation After VO2max4	176,5	73,5	2.31	149	5	0.44	88	340	45	14	0.9	9
A	Transfusion	5	16	15w Post Donation After VO2max4	178,9	78,3	2.41	137	5.1	0.43	85	318	51	23	1	10
B	Transfusion	5	16	15w Post Donation After VO2max4	195,3	94,8	2.52	143	5.2	0.44	85	324	47	103	0.903846	9.04
C	Transfusion	5	16	15w Post Donation After VO2max4	178,7	93,2	2.19	141	5	0.42	85	333	56	11	1.12	11.2
D	Transfusion	5	16	15w Post Donation After VO2max4	174	71,7	2.19	148	5.3	0.44	84	335	49	17	0.924528	9.25
F	Transfusion	5	16	15w Post Donation After VO2max4	175,9	71,8	2.59	134	4.5	0.41	90	331	24	8.5	0.533333	5.33
G	Transfusion	5	16	15w Post Donation After VO2max4	180,5	97,7	2.25	145	4.8	0.42	88	344	69	23	1.4375	14.38
H	Transfusion	5	16	15w Post Donation After VO2max4	189	81,7
N	Transfusion	5	16	15w Post Donation After VO2max4	182,7	92,9
Q	Transfusion	5	16	15w Post Donation After VO2max4	172,7	72,9	2.65	140	4.7	0.42	90	332	39	16	0.829787	8.3
R	Transfusion	5	16	15w Post Donation After VO2max4	186,6	68,3	2.09	139	4.6	0.4	86	348	41	9.5	0.891304	8.91
T	Transfusion	5	16	15w Post Donation After VO2max4	174,2	87,6	2.15	136	4.6	0.4	88	338	42	13	0.913043	9.13
J	Control	6	16	1h Before Reinfusion
K	Control	6	16	1h Before Reinfusion	178,6	78,7
L	Control	6	16	1h Before Reinfusion	190,5	103,4
M	Control	6	16	1h Before Reinfusion	182,6	80,1
O	Control	6	16	1h Before Reinfusion	191,4	88,6
S	Control	6	16	1h Before Reinfusion	181,6	97,7
U	Control	6	16	1h Before Reinfusion	177,6	73
W	Control	6	16	1h Before Reinfusion	176,5	73,5
A	Transfusion	6	16	1h Before Reinfusion	178,9	78,3	3.06	141	5.1	0.43	84	329	44	19	0.862745	8.63
B	Transfusion	6	16	1h Before Reinfusion	195,3	94,8	2.38	143	5	0.42	84	340	43	27	0.86	8.6
C	Transfusion	6	16	1h Before Reinfusion	178,7	93,2	2.8	147	5.1	0.43	84	339	49	6.8	0.960784	9.61
D	Transfusion	6	16	1h Before Reinfusion	174	71,7	2.12	139	5	0.41	83	336	65	27	1.3	13
F	Transfusion	6	16	1h Before Reinfusion	175,9	71,8	3.53	139	4.6	0.41	89	336	57	8.9	1.23913	12.39
G	Transfusion	6	16	1h Before Reinfusion	180,5	97,7	2.99	153	5	0.44	87	349	78	14	1.56	15.6
H	Transfusion	6	16	1h Before Reinfusion	189	81,7	2.43	147	5.2	0.43	82	346	31	7.7	0.596154	5.96
N	Transfusion	6	16	1h Before Reinfusion	182,7	92,9	2.97	146	5	0.42	83	350	34	11	0.68	6.8
Q	Transfusion	6	16	1h Before Reinfusion	172,7	72,9	2.58	152	5	0.44	88	345	39	17	0.78	7.8
R	Transfusion	6	16	1h Before Reinfusion	186,6	68,3	2.03	135	4.5	0.4	89	339	44	14	0.977778	9.78
T	Transfusion	6	16	1h Before Reinfusion	174,2	87,6	2.21	147	4.8	0.42	87	351	52	9.8	1.08333	10.83
J	Control	7	16	1h After Reinfusion
K	Control	7	16	1h After Reinfusion	178,6	78,7
L	Control	7	16	1h After Reinfusion	190,5	103,4
M	Control	7	16	1h After Reinfusion	182,6	80,1
O	Control	7	16	1h After Reinfusion	191,4	88,6
S	Control	7	16	1h After Reinfusion	181,6	97,7
U	Control	7	16	1h After Reinfusion	177,6	73
W	Control	7	16	1h After Reinfusion	176,5	73,5
A	Transfusion	7	16	1h After Reinfusion	178,9	78,3	2.39	143	5.2	0.44	84	327	54	19	1.03846	10.38
B	Transfusion	7	16	1h After Reinfusion	195,3	94,8	2.37	153	5.4	0.45	83	342	48	91	0.888889	8.89
C	Transfusion	7	16	1h After Reinfusion	178,7	93,2	2.04	147	5.1	0.43	85	343	48	9.5	0.941176	9.41
D	Transfusion	7	16	1h After Reinfusion	174	71,7	2.13	150	5.3	0.44	84	339	56	27	1.0566	10.57
F	Transfusion	7	16	1h After Reinfusion	175,9	71,8	2.72	146	4.8	0.43	89	339	50	11	1.04167	10.42
G	Transfusion	7	16	1h After Reinfusion	180,5	97,7	2.28	154	5.1	0.44	87	352	77	15	1.5098	15.1
H	Transfusion	7	16	1h After Reinfusion	189	81,7	2.57	158	5.5	0.46	83	347	34	9.9	0.618182	6.18
N	Transfusion	7	16	1h After Reinfusion	182,7	92,9	3.08	154	5.2	0.44	84	348	34	7.2	0.653846	6.54
Q	Transfusion	7	16	1h After Reinfusion	172,7	72,9	2.79	155	5.1	0.46	89	340	38	24	0.745098	7.45
R	Transfusion	7	16	1h After Reinfusion	186,6	68,3	1.86	136	4.5	0.4	88	339	44	12	0.977778	9.78
T	Transfusion	7	16	1h After Reinfusion	174,2	87,6	2.5	151	5	0.44	88	341	39	7.9	0.78	7.8
J	Control	8	17	48h After Re-infusion Before VO2max5
K	Control	8	17	48h After Re-infusion Before VO2max5	178,6	78,7	2.01	148	5	0.43	86	342	59	12	1.18	11.8
L	Control	8	17	48h After Re-infusion Before VO2max5	190,5	103,4	2.89	156	5.2	0.46	88	338	61	23	1.17308	11.73
M	Control	8	17	48h After Re-infusion Before VO2max5	182,6	80,1	1.92	130	4.8	0.38	81	339	34	9.5	0.708333	7.08
O	Control	8	17	48h After Re-infusion Before VO2max5	191,4	88,6	2.26	128	4.4	0.39	90	326		12		0
S	Control	8	17	48h After Re-infusion Before VO2max5	181,6	97,7	2.41	136	4.9	0.4	83	337	49	6.3	1	10
U	Control	8	17	48h After Re-infusion Before VO2max5	177,6	73	2.03	139	4.6	0.4	87	348	50	7	1.08696	10.87
W	Control	8	17	48h After Re-infusion Before VO2max5	176,5	73,5	2.05	142	4.7	0.42	88	341	35	12	0.744681	7.45
A	Transfusion	8	17	48h After Re-infusion Before VO2max5	178,9	78,3	2.25	143	5.2	0.44	85	322	43	15	0.826923	8.27
B	Transfusion	8	17	48h After Re-infusion Before VO2max5	195,3	94,8	2.35	154	5.5	0.46	83	338	41	89	0.745455	7.45
C	Transfusion	8	17	48h After Re-infusion Before VO2max5	178,7	93,2	1.98	139	5	0.42	85	332	34	7.8	0.68	6.8
D	Transfusion	8	17	48h After Re-infusion Before VO2max5	174	71,7	2.12	148	5.3	0.44	83	336	67	14	1.26415	12.64
F	Transfusion	8	17	48h After Re-infusion Before VO2max5	175,9	71,8	2.63	147	4.9	0.44	90	333	50	4	1.02041	10.2
G	Transfusion	8	17	48h After Re-infusion Before VO2max5	180,5	97,7	2.27	158	5.2	0.46	87	346	79	6	1.51923	15.19
H	Transfusion	8	17	48h After Re-infusion Before VO2max5	189	81,7	2.58	152	5.4	0.45	83	342		4.8		0
N	Transfusion	8	17	48h After Re-infusion Before VO2max5	182,7	92,9	2.99	148	5.1	0.43	84	346	32	6.8	0.627451	6.27
Q	Transfusion	8	17	48h After Re-infusion Before VO2max5	172,7	72,9	2.62	154	5	0.45	89	343	33	7.8	0.66	6.6
R	Transfusion	8	17	48h After Re-infusion Before VO2max5	186,6	68,3	1.97	137	4.6	0.41	88	337	48	8.6	1.04348	10.43
T	Transfusion	8	17	48h After Re-infusion Before VO2max5	174,2	87,6	2.08	141	4.7	0.41	88	341	45	7.1	0.957447	9.57
J	Control	9	17	48h After Re-infusion After VO2max5
K	Control	9	17	48h After Re-infusion After VO2max5	178,6	78,7	2.01	147	5	0.43	85	343		9.7		0
L	Control	9	17	48h After Re-infusion After VO2max5	190,5	103,4	2.65	150	5.1	0.45	88	334		19		0
M	Control	9	17	48h After Re-infusion After VO2max5	182,6	80,1	2.03	134	4.8	0.39	81	343	36	8.6	0.75	7.5
O	Control	9	17	48h After Re-infusion After VO2max5	191,4	88,6	2.4	132	4.5	0.4	89	330	58	12	1.28889	12.89
S	Control	9	17	48h After Re-infusion After VO2max5	181,6	97,7	2.58	143	5.1	0.42	83	341	53	5.1	1.03922	10.39
U	Control	9	17	48h After Re-infusion After VO2max5	177,6	73	2.16	144	4.8	0.42	87	344	44	7.2	0.916667	9.17
W	Control	9	17	48h After Re-infusion After VO2max5	176,5	73,5	2.23	148	4.9	0.43	88	344	39	13	0.795918	7.96
A	Transfusion	9	17	48h After Re-infusion After VO2max5	178,9	78,3	2.42	147	5.4	0.45	84	326	49	16	0.907407	9.07
B	Transfusion	9	17	48h After Re-infusion After VO2max5	195,3	94,8
C	Transfusion	9	17	48h After Re-infusion After VO2max5	178,7	93,2
D	Transfusion	9	17	48h After Re-infusion After VO2max5	174	71,7	2.35	153	5.3	0.44	83	345	58	13	1.09434	10.94
F	Transfusion	9	17	48h After Re-infusion After VO2max5	175,9	71,8	2.75	147	4.9	0.44	90	333	51	4.9	1.04082	10.41
G	Transfusion	9	17	48h After Re-infusion After VO2max5	180,5	97,7	2.33	160	5.3	0.46	87	346		7.2		0
H	Transfusion	9	17	48h After Re-infusion After VO2max5	189	81,7
N	Transfusion	9	17	48h After Re-infusion After VO2max5	182,7	92,9	3.22	161	5.4	0.46	85	350	39	7.5	0.722222	7.22
Q	Transfusion	9	17	48h After Re-infusion After VO2max5	172,7	72,9	2.73	156	5.1	0.45	88	345	37	8.2	0.72549	7.25
R	Transfusion	9	17	48h After Re-infusion After VO2max5	186,6	68,3	2.14	142	4.7	0.42	88	342	50	7.9	1.06383	10.64
T	Transfusion	9	17	48h After Re-infusion After VO2max5	174,2	87,6	2.25	148	4.8	0.42	88	349	43	6.7	0.895833	8.96
J	Control	10	18	1w After Reinfusion Before VO2max6
K	Control	10	18	1w After Reinfusion Before VO2max6	178,6	78,7	1.95	145	4.8	0.42	87	345	55	9.8	1.14583	11.46
L	Control	10	18	1w After Reinfusion Before VO2max6	190,5	103,4
M	Control	10	18	1w After Reinfusion Before VO2max6	182,6	80,1	1.96	134	4.9	0.4	81	338	33	9	0.673469	6.73
O	Control	10	18	1w After Reinfusion Before VO2max6	191,4	88,6	2.29	137	4.6	0.41	88	338	59	13	1.28261	12.83
S	Control	10	18	1w After Reinfusion Before VO2max6	181,6	97,7	2.47	138	4.9	0.41	83	338	49	7.3	1	10
U	Control	10	18	1w After Reinfusion Before VO2max6	177,6	73	1.85	136	4.6	0.4	88	338	45	5.7	0.978261	9.78
W	Control	10	18	1w After Reinfusion Before VO2max6	176,5	73,5	1.97	136	4.5	0.39	87	345	32	15	0.711111	7.11
A	Transfusion	10	18	1w After Reinfusion Before VO2max6	178,9	78,3	2.29	142	5	0.43	86	329	35	20	0.7	7
B	Transfusion	10	18	1w After Reinfusion Before VO2max6	195,3	94,8	2.31	150	5.2	0.44	84	344	33	90	0.634615	6.35
C	Transfusion	10	18	1w After Reinfusion Before VO2max6	178,7	93,2	1.95	139	4.8	0.41	84	339	25	6.6	0.520833	5.21
D	Transfusion	10	18	1w After Reinfusion Before VO2max6	174	71,7		148	5.3	0.44	84	335	84		1.58491	15.85
F	Transfusion	10	18	1w After Reinfusion Before VO2max6	175,9	71,8	2.49	140	4.5	0.41	90	342	30	8.2	0.666667	6.67
G	Transfusion	10	18	1w After Reinfusion Before VO2max6	180,5	97,7	2.2	152	5	0.43	87	353	59	9.8	1.18	11.8
H	Transfusion	10	18	1w After Reinfusion Before VO2max6	189	81,7	2.38	152	5.2	0.43	83	351	25	5.8	0.480769	4.81
N	Transfusion	10	18	1w After Reinfusion Before VO2max6	182,7	92,9	2.94	148	5.1	0.43	84	344	28	6.9	0.54902	5.49
Q	Transfusion	10	18	1w After Reinfusion Before VO2max6	172,7	72,9	2.43	142	4.7	0.41	88	344	26	12	0.553191	5.53
R	Transfusion	10	18	1w After Reinfusion Before VO2max6	186,6	68,3	1.91	132	4.4	0.39	89	337	40	9.5	0.909091	9.09
T	Transfusion	10	18	1w After Reinfusion Before VO2max6	174,2	87,6	2.02	141	4.6	0.41	88	345	30	13	0.652174	6.52
J	Control	11	18	1w After Reinfusion After VO2max6
K	Control	11	18	1w After Reinfusion After VO2max6	178,6	78,7	2.01	146	4.9	0.42	86	348	59		1.20408	12.04
L	Control	11	18	1w After Reinfusion After VO2max6	190,5	103,4
M	Control	11	18	1w After Reinfusion After VO2max6	182,6	80,1	2.09	138	5	0.4	80	342	35	9.4	0.7	7
O	Control	11	18	1w After Reinfusion After VO2max6	191,4	88,6	2.31	134	4.5	0.41	89	330	54	13	1.2	12
S	Control	11	18	1w After Reinfusion After VO2max6	181,6	97,7	2.51	139	5	0.41	82	339	53	6.3	1.06	10.6
U	Control	11	18	1w After Reinfusion After VO2max6	177,6	73	1.91	136	4.6	0.4	88	339	42	5.4	0.913043	9.13
W	Control	11	18	1w After Reinfusion After VO2max6	176,5	73,5	2.16	144	4.7	0.41	88	351	32	14	0.680851	6.81
A	Transfusion	11	18	1w After Reinfusion After VO2max6	178,9	78,3	2.31	143	5.2	0.43	84	330	38		0.730769	7.31
B	Transfusion	11	18	1w After Reinfusion After VO2max6	195,3	94,8
C	Transfusion	11	18	1w After Reinfusion After VO2max6	178,7	93,2	2.01	145	5	0.42	84	345	27		0.54	5.4
D	Transfusion	11	18	1w After Reinfusion After VO2max6	174	71,7
F	Transfusion	11	18	1w After Reinfusion After VO2max6	175,9	71,8	2.74	145	4.7	0.43	90	341	32		0.680851	6.81
G	Transfusion	11	18	1w After Reinfusion After VO2max6	180,5	97,7	2.39	162	5.2	0.45	87	358	59		1.13462	11.35
H	Transfusion	11	18	1w After Reinfusion After VO2max6	189	81,7
N	Transfusion	11	18	1w After Reinfusion After VO2max6	182,7	92,9	3.09	152	5.2	0.44	84	346	28	6.9	0.538462	5.38
Q	Transfusion	11	18	1w After Reinfusion After VO2max6	172,7	72,9	2.38	139	4.6	0.41	87	343	21	13	0.456522	4.57
R	Transfusion	11	18	1w After Reinfusion After VO2max6	186,6	68,3	2.2	140	4.6	0.41	88	342	47	8.6	1.02174	10.22
T	Transfusion	11	18	1w After Reinfusion After VO2max6	174,2	87,6	2.26	148	4.9	0.43	88	343	39	14	0.795918	7.96
J	Control	12	19	2w After Reinfusion Before VO2max7
K	Control	12	19	2w After Reinfusion Before VO2max7	178,6	78,7	2.05	150	5	0.43	86	348	48	8	0.96	9.6
L	Control	12	19	2w After Reinfusion Before VO2max7	190,5	103,4
M	Control	12	19	2w After Reinfusion Before VO2max7	182,6	80,1	2.07	133	4.9	0.4	82	333	38	11	0.77551	7.76
O	Control	12	19	2w After Reinfusion Before VO2max7	191,4	88,6	2.1	127	4.2	0.38	90	333	45	14	1.07143	10.71
S	Control	12	19	2w After Reinfusion Before VO2max7	181,6	97,7	2.55	140	4.9	0.41	83	340	44	5.9	0.897959	8.98
U	Control	12	19	2w After Reinfusion Before VO2max7	177,6	73	1.66	127	4.2	0.37	89	341	27	6.7	0.642857	6.43
W	Control	12	19	2w After Reinfusion Before VO2max7	176,5	73,5	2.11	143	4.7	0.42	88	344	32	11	0.680851	6.81
A	Transfusion	12	19	2w After Reinfusion Before VO2max7	178,9	78,3	2.23	138	4.9	0.42	85	333	46	19	0.938776	9.39
B	Transfusion	12	19	2w After Reinfusion Before VO2max7	195,3	94,8	2.4	148	5.2	0.44	84	339	31	104	0.596154	5.96
C	Transfusion	12	19	2w After Reinfusion Before VO2max7	178,7	93,2	2.13	142	4.9	0.42	85	342	41	8.8	0.836735	8.37
D	Transfusion	12	19	2w After Reinfusion Before VO2max7	174	71,7	1.97	138	4.8	0.41	84	339	51	16	1.0625	10.63
F	Transfusion	12	19	2w After Reinfusion Before VO2max7	175,9	71,8	2.52	140	4.6	0.42	91	335	27	6.3	0.586957	5.87
G	Transfusion	12	19	2w After Reinfusion Before VO2max7	180,5	97,7	2.16	146	4.8	0.42	87	348	76	14	1.58333	15.83
H	Transfusion	12	19	2w After Reinfusion Before VO2max7	189	81,7	2.26	155	5.4	0.44	81	356	33	4.9	0.611111	6.11
N	Transfusion	12	19	2w After Reinfusion Before VO2max7	182,7	92,9	2.91	146	5	0.43	85	340	31	6.4	0.62	6.2
Q	Transfusion	12	19	2w After Reinfusion Before VO2max7	172,7	72,9
R	Transfusion	12	19	2w After Reinfusion Before VO2max7	186,6	68,3	2.13	137	4.6	0.41	90	337	38	7.7	0.826087	8.26
T	Transfusion	12	19	2w After Reinfusion Before VO2max7	174,2	87,6	2.12	138	4.5	0.41	90	340	41	11	0.911111	9.11
J	Control	13	19	2w After Reinfusion After VO2max7
K	Control	13	19	2w After Reinfusion After VO2max7	178,6	78,7	2.22	154	5.1	0.43	85	355	50		0.980392	9.8
L	Control	13	19	2w After Reinfusion After VO2max7	190,5	103,4
M	Control	13	19	2w After Reinfusion After VO2max7	182,6	80,1	2.05	135	4.9	0.4	82	337	37	11	0.755102	7.55
O	Control	13	19	2w After Reinfusion After VO2max7	191,4	88,6	2.33	130	4.4	0.39	88	338	45	12	1.02273	10.23
S	Control	13	19	2w After Reinfusion After VO2max7	181,6	97,7	2.75	146	2.5	0.43	83	336	50	6.1	2	20
U	Control	13	19	2w After Reinfusion After VO2max7	177,6	73	1.82	128	4.3	0.38	88	337	35	7.2	0.813953	8.14
W	Control	13	19	2w After Reinfusion After VO2max7	176,5	73,5	2.32	149	5	0.44	88	340	35	12	0.7	7
A	Transfusion	13	19	2w After Reinfusion After VO2max7	178,9	78,3	2.45	144	5.1	0.43	84	332	48		0.941176	9.41
B	Transfusion	13	19	2w After Reinfusion After VO2max7	195,3	94,8
C	Transfusion	13	19	2w After Reinfusion After VO2max7	178,7	93,2	2.17	142	4.9	0.42	84	342	40		0.816327	8.16
D	Transfusion	13	19	2w After Reinfusion After VO2max7	174	71,7
F	Transfusion	13	19	2w After Reinfusion After VO2max7	175,9	71,8	2.59	143	4.6	0.42	91	338	24		0.521739	5.22
G	Transfusion	13	19	2w After Reinfusion After VO2max7	180,5	97,7
H	Transfusion	13	19	2w After Reinfusion After VO2max7	189	81,7
N	Transfusion	13	19	2w After Reinfusion After VO2max7	182,7	92,9
Q	Transfusion	13	19	2w After Reinfusion After VO2max7	172,7	72,9
R	Transfusion	13	19	2w After Reinfusion After VO2max7	186,6	68,3	2.41	147	4.9	0.44	89	336	43	7	0.877551	8.78
T	Transfusion	13	19	2w After Reinfusion After VO2max7	174,2	87,6	2.07	137	4.5	0.4	89	340	37	9.3	0.822222	8.22
J	Control	14	20	3w After Reinfusion Before VO2max8
K	Control	14	20	3w After Reinfusion Before VO2max8	178,6	78,7	2.06	146	4.8	0.41	86	354	40	8.1	0.833333	8.33
L	Control	14	20	3w After Reinfusion Before VO2max8	190,5	103,4	2.79	151	4.9	0.43	87	351	64	18	1.30612	13.06
M	Control	14	20	3w After Reinfusion Before VO2max8	182,6	80,1	1.94	136	4.9	0.4	81	340	38	7.3	0.77551	7.76
O	Control	14	20	3w After Reinfusion Before VO2max8	191,4	88,6	2.12	132	4.5	0.4	89	333	64	15	1.42222	14.22
S	Control	14	20	3w After Reinfusion Before VO2max8	181,6	97,7	2.44	136	4.8	0.4	84	338	50	6.7	1.04167	10.42
U	Control	14	20	3w After Reinfusion Before VO2max8	177,6	73
W	Control	14	20	3w After Reinfusion Before VO2max8	176,5	73,5	2.14	138	4.6	0.4	88	342	28	13	0.608696	6.09
A	Transfusion	14	20	3w After Reinfusion Before VO2max8	178,9	78,3	2.29	142	5	0.43	85	334	54	20	1.08	10.8
B	Transfusion	14	20	3w After Reinfusion Before VO2max8	195,3	94,8	2.29	143	5	0.42	83	343	34	119	0.68	6.8
C	Transfusion	14	20	3w After Reinfusion Before VO2max8	178,7	93,2	2.07	141	4.9	0.42	85	339	44	8	0.897959	8.98
D	Transfusion	14	20	3w After Reinfusion Before VO2max8	174	71,7	1.95	139	4.9	0.41	84	338	54	19	1.10204	11.02
F	Transfusion	14	20	3w After Reinfusion Before VO2max8	175,9	71,8	2.33	140	4.5	0.41	90	343	28	5.3	0.622222	6.22
G	Transfusion	14	20	3w After Reinfusion Before VO2max8	180,5	97,7	2.17	148	4.8	0.42	86	357	89	16	1.85417	18.54
H	Transfusion	14	20	3w After Reinfusion Before VO2max8	189	81,7	2.18	151	5.2	0.43	82	353	29	5.6	0.557692	5.58
N	Transfusion	14	20	3w After Reinfusion Before VO2max8	182,7	92,9	2.63	133	4.7	0.4	85	333	34	7.4	0.723404	7.23
Q	Transfusion	14	20	3w After Reinfusion Before VO2max8	172,7	72,9	2.37	138	4.5	0.4	88	344	39	16	0.866667	8.67
R	Transfusion	14	20	3w After Reinfusion Before VO2max8	186,6	68,3	2.1	131	4.4	0.4	89	332	38	12	0.863636	8.64
T	Transfusion	14	20	3w After Reinfusion Before VO2max8	174,2	87,6	2.3	149	4.8	0.43	89	345	54	12	1.125	11.25
J	Control	15	20	3w After Reinfusion After VO2max8
K	Control	15	20	3w After Reinfusion After VO2max8	178,6	78,7	2.2	149	5	0.42	85	354	45		0.9	9
L	Control	15	20	3w After Reinfusion After VO2max8	190,5	103,4	2.83	152	5	0.44	87	349	65		1.3	13
M	Control	15	20	3w After Reinfusion After VO2max8	182,6	80,1	2.25	144	5.2	0.42	81	340	47	7.4	0.903846	9.04
O	Control	15	20	3w After Reinfusion After VO2max8	191,4	88,6	2.32	134	4.6	0.4	88	332	65	15	1.41304	14.13
S	Control	15	20	3w After Reinfusion After VO2max8	181,6	97,7	2.66	139	4.9	0.41	84	336	50	7.6	1.02041	10.2
U	Control	15	20	3w After Reinfusion After VO2max8	177,6	73
W	Control	15	20	3w After Reinfusion After VO2max8	176,5	73,5
A	Transfusion	15	20	3w After Reinfusion After VO2max8	178,9	78,3
B	Transfusion	15	20	3w After Reinfusion After VO2max8	195,3	94,8
C	Transfusion	15	20	3w After Reinfusion After VO2max8	178,7	93,2	2.18	145	5	0.42	84	342	43		0.86	8.6
D	Transfusion	15	20	3w After Reinfusion After VO2max8	174	71,7
F	Transfusion	15	20	3w After Reinfusion After VO2max8	175,9	71,8	2.49	140	4.6	0.41	90	340	29		0.630435	6.3
G	Transfusion	15	20	3w After Reinfusion After VO2max8	180,5	97,7
H	Transfusion	15	20	3w After Reinfusion After VO2max8	189	81,7	2.41	159	5.5	0.44	81	358	32		0.581818	5.82
N	Transfusion	15	20	3w After Reinfusion After VO2max8	182,7	92,9	2.84	140	4.8	0.41	85	341	34	8.8	0.708333	7.08
Q	Transfusion	15	20	3w After Reinfusion After VO2max8	172,7	72,9
R	Transfusion	15	20	3w After Reinfusion After VO2max8	186,6	68,3	2.2	134	4.5	0.4	88	336	38	12	0.844444	8.44
T	Transfusion	15	20	3w After Reinfusion After VO2max8	174,2	87,6	2.21	146	4.8	0.43	90	340	47	12	0.979167	9.79
J	Control	16	21	4w After Reinfusion Before VO2max9
K	Control	16	21	4w After Reinfusion Before VO2max9	178,6	78,7	2.07	146	4.8	0.42	86	351	71	8.8	1.47917	14.79
L	Control	16	21	4w After Reinfusion Before VO2max9	190,5	103,4	2.59	151	4.9	0.42	87	358	57	23	1.16327	1.16
M	Control	16	21	4w After Reinfusion Before VO2max9	182,6	80,1	2.43	144	5.2	0.43	81	339	43	9.6	0.826923	8.27
O	Control	16	21	4w After Reinfusion Before VO2max9	191,4	88,6	2.16	128	4.3	0.38	89	336	62	15	1.44186	14.42
S	Control	16	21	4w After Reinfusion Before VO2max9	181,6	97,7	2.57	134	4.7	0.39	84	341	41	7.5	0.87234	8.72
U	Control	16	21	4w After Reinfusion Before VO2max9	177,6	73
W	Control	16	21	4w After Reinfusion Before VO2max9	176,5	73,5	2.3	140	4.6	0.41	88	344	26	14	0.565217	5.65
A	Transfusion	16	21	4w After Reinfusion Before VO2max9	178,9	78,3	2.47	146	5.1	0.43	84	342	52	16	1.01961	10.2
B	Transfusion	16	21	4w After Reinfusion Before VO2max9	195,3	94,8
C	Transfusion	16	21	4w After Reinfusion Before VO2max9	178,7	93,2	2	137	4.8	0.4	85	339	49	7.7	1.02083	10.21
D	Transfusion	16	21	4w After Reinfusion Before VO2max9	174	71,7	2.04	142	5	0.41	83	345	54	19	1.08	10.8
F	Transfusion	16	21	4w After Reinfusion Before VO2max9	175,9	71,8	2.39	138	4.4	0.4	90	344	35	6.8	0.795455	7.95
G	Transfusion	16	21	4w After Reinfusion Before VO2max9	180,5	97,7	2.12	143	4.6	0.4	86	357	104	19	2.26087	22.61
H	Transfusion	16	21	4w After Reinfusion Before VO2max9	189	81,7	2.16	144	4.9	0.41	82	356	37	7.2	0.755102	7.55
N	Transfusion	16	21	4w After Reinfusion Before VO2max9	182,7	92,9	3.02	139	4.7	0.41	86	342	33	6.9	0.702128	7.02
Q	Transfusion	16	21	4w After Reinfusion Before VO2max9	172,7	72,9
R	Transfusion	16	21	4w After Reinfusion Before VO2max9	186,6	68,3	2.23	133	4.4	0.4	91	337	31	9.4	0.704545	7.05
T	Transfusion	16	21	4w After Reinfusion Before VO2max9	174,2	87,6	2.26	147	4.8	0.44	91	337	35	7.1	0.729167	7.29
J	Control	17	21	4w After Reinfusion After VO2max9
K	Control	17	21	4w After Reinfusion After VO2max9	178,6	78,7		153	5	0.43	85	360	66		1.32	13.2
L	Control	17	21	4w After Reinfusion After VO2max9	190,5	103,4
M	Control	17	21	4w After Reinfusion After VO2max9	182,6	80,1
O	Control	17	21	4w After Reinfusion After VO2max9	191,4	88,6	2.35	131	4.4	0.4	89	332	58		1.31818	13.18
S	Control	17	21	4w After Reinfusion After VO2max9	181,6	97,7
U	Control	17	21	4w After Reinfusion After VO2max9	177,6	73
W	Control	17	21	4w After Reinfusion After VO2max9	176,5	73,5	2.47	144	4.8	0.43	88	339	30		0.625	6.25
A	Transfusion	17	21	4w After Reinfusion After VO2max9	178,9	78,3	2.54	147	5.2	0.43	83	340	46		0.884615	8.85
B	Transfusion	17	21	4w After Reinfusion After VO2max9	195,3	94,8
C	Transfusion	17	21	4w After Reinfusion After VO2max9	178,7	93,2	2.1	143	4.9	0.41	84	350	51		1.04082	10.41
D	Transfusion	17	21	4w After Reinfusion After VO2max9	174	71,7	2.07	140	4.9	0.41	83	346	60		1.22449	12.24
F	Transfusion	17	21	4w After Reinfusion After VO2max9	175,9	71,8	2.59	142	4.6	0.42	90	342	33		0.717391	7.17
G	Transfusion	17	21	4w After Reinfusion After VO2max9	180,5	97,7
H	Transfusion	17	21	4w After Reinfusion After VO2max9	189	81,7		146	5.1	0.42	82	349	40		0.784314	7.84
N	Transfusion	17	21	4w After Reinfusion After VO2max9	182,7	92,9	3.22	146	5	0.43	86	341	37		0.74	7.4
Q	Transfusion	17	21	4w After Reinfusion After VO2max9	172,7	72,9
R	Transfusion	17	21	4w After Reinfusion After VO2max9	186,6	68,3	2.3	134	4.5	0.4	90	332	38		0.844444	8.44
T	Transfusion	17	21	4w After Reinfusion After VO2max9	174,2	87,6	2.53	155	5	0.45	90	341	35		0.7	7
